# Supplementary material for: Mesoporous nitrogen, sulfur co-doped carbon dots/CoS hybrid as an efficient electrocatalyst for hydrogen evolution
Source: Royal Society of Chemistry journal article supplement (doi:10.1039/c6ta09580a), 2016-12-29
Supplement: c6ta09580a1.pdf [file c6ta09580a1.pdf]

# Mesoporous nitrogen, sulfur codoped carbon dots/CoS hybrid as an efficient electrocatalyst for hydrogen evolution

## Supporting information

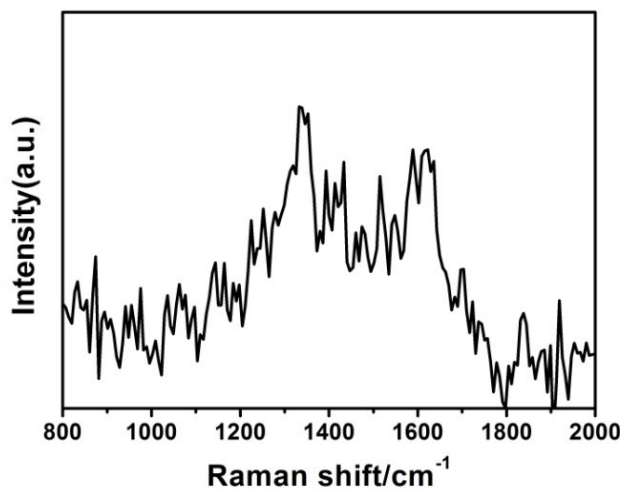

Fig. S1 Raman spectrum of NSCDs.

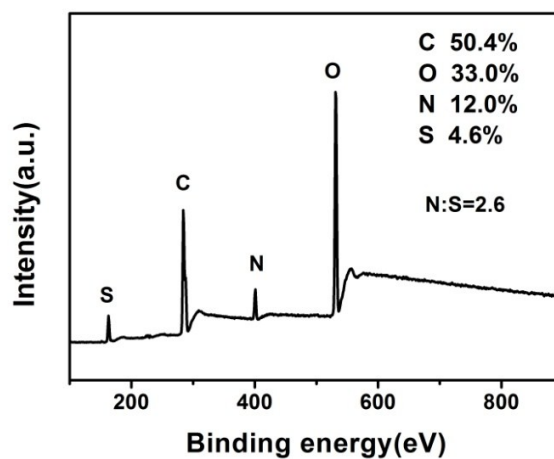

Fig. S2 XPS spectrum of NSCDs. The atomic ratio of N: S for the as-produced NSCDs is 2.6.

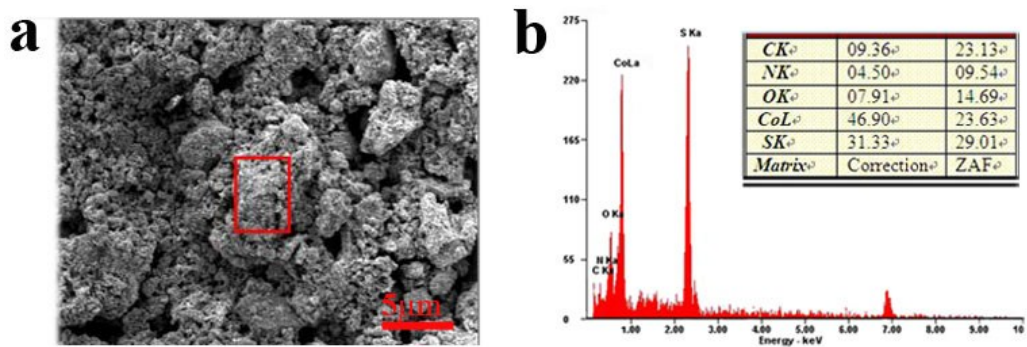

**Fig. S3** (a) SEM image and (b) the corresponding EDS profile of NSCDs/CoS-2.

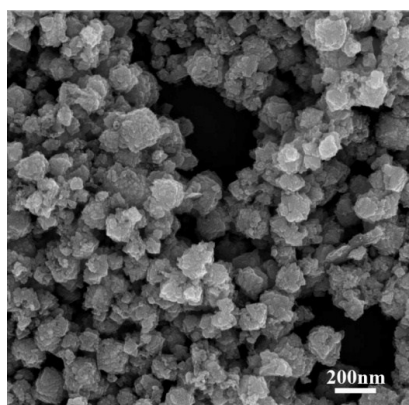

**Fig. S4** SEM image of CoS.

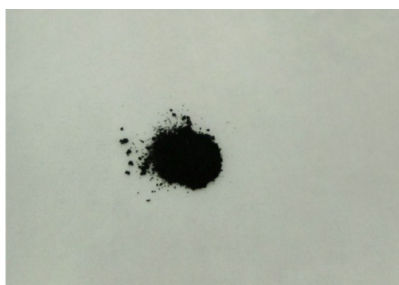

**Fig. S5** Digital photo of NSCDs/CoS-2.

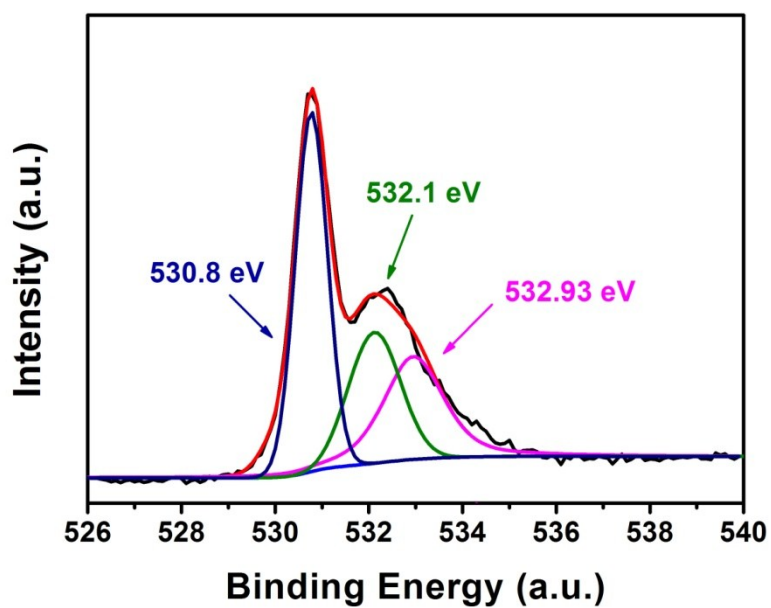

Fig. S6 High resolution O 1s XPS spectra of NSCDs/CoS-2.

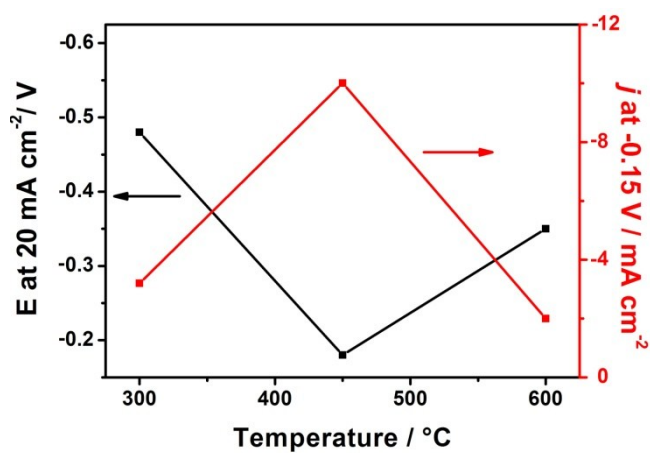

Fig. S7 The variation of the potential at a current density of  $20 \text{ mA}\cdot\text{cm}^{-2}$  (black trace) and current density at  $0.15 \text{ V}$  (the red trace) with different heat-treatment temperature.

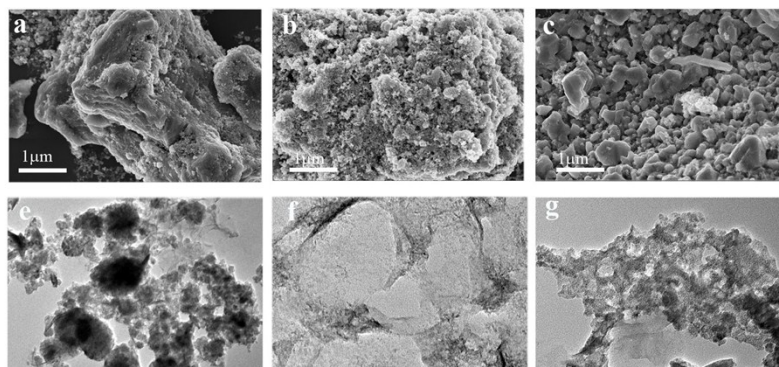

Fig. S8 SEM (a, b and c) and TEM (e, f and g) images of NSCDs/CoS samples calcined at  $300 \text{ }^\circ\text{C}$ ,  $450 \text{ }^\circ\text{C}$  and  $600 \text{ }^\circ\text{C}$ , respectively.

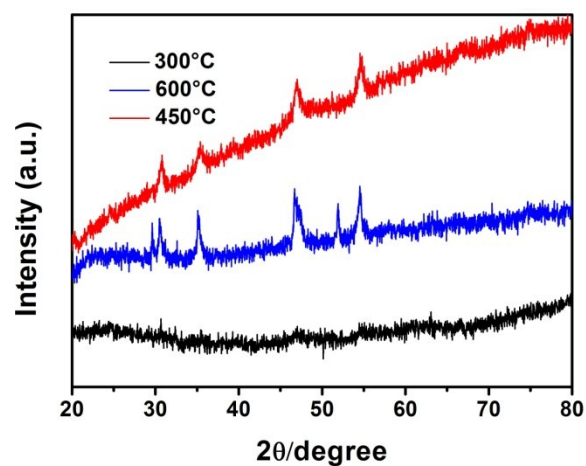

**Fig. S9** XRD patterns of NSCDs/CoS calcined at 300 °C (black), 450 °C (red) and 600 °C (blue), respectively.

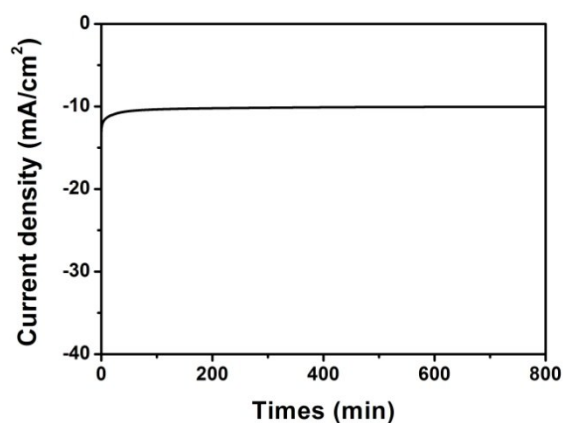

**Fig. S10** Chronoamperometric response for NSCDs/CoS-2 (graphite rod as counter electrode).

**Table 1** Comparisons of the HER performance in 0.5 M H<sub>2</sub>SO<sub>4</sub> electrolyte among the NSCDs/CoS with the similar electrocatalysts.

| Catalyst            | Loading (mg/cm <sup>2</sup> ) | Current density (mA cm <sup>-2</sup> ) | $\eta$ (mV) | Tafel Slope (mV dec <sup>-1</sup> ) | Ref.             |
|---------------------|-------------------------------|----------------------------------------|-------------|-------------------------------------|------------------|
| WS <sub>2</sub> /CC | 14                            | 10                                     | 184         | 72                                  | 45               |
| MW/CoS              | ~                             | 10                                     | 275         | 75                                  | 46               |
| CoS/CP/CT           | 0.32                          | 10                                     | 180         | 72                                  | 47               |
| ST-CoS              | ~                             | 10                                     | 298         | 90                                  | 48               |
| NSCDs/CoS           | <b>0.25</b>                   | <b>10</b>                              | <b>165</b>  | <b>56</b>                           | <b>This work</b> |
